# Supplementary material for: Plastid genome analysis of three Nemaliophycidae red algal species suggests environmental adaptation for iron limited habitats
Source: PLoS One. 2018 May 8;13(5):e0196995. doi: 10.1371/journal.pone.0196995 (PMC5940233; doi:10.1371/journal.pone.0196995)
Supplement: S1 Table — (XLSX) [file pone.0196995.s003.xlsx]

## Sheet: S1 Table
S1 Table. The sequencing information for the plastid genome of three Nemaliophyicdae species.
Species	No.	Read Counts	Total bp	N50 of Contig Length		Number of contigs
				CLC	MIRA	CLC	MIRA
Kumanoa americana	1	504567	115 Mbp	621	-	20607	-
	2	2356093	415 Mbp	607	-	95530	-
	3	546649	115 Mbp	630	-	28409	-
	4	6776511	1.29 Gbp	-	5251	-	7083
Palmaria palmata	1	503299	92.8 Mbp	530	3025	6158	281
	2	3967593	537 Mbp	439	2026	38823	1727
	3	3099744	1.02 Gbp	593	2919	111098	1080
	4	427191	82.1 Mbp	521	2753	5821	267
Thorea hispida	1	4551426	1.10 Gbp	1752	7964	80034	3281
