# Supplementary material for: Plastid genome analysis of three Nemaliophycidae red algal species suggests environmental adaptation for iron limited habitats
Source: PLoS One. 2018 May 8;13(5):e0196995. doi: 10.1371/journal.pone.0196995 (PMC5940233; doi:10.1371/journal.pone.0196995)
Supplement: S2 Table — (XLSX) [file pone.0196995.s004.xlsx]

## Sheet: S2 Table
S2 Table. A list of genes in the plastid genomes of Palmaria palmata, Kumanoa americana, and Thorea hispida.
						Palmaria palmata										Kumanoa americana										Thorea hispida
Classification		Number	Gene									Number	Gene									Number	Gene
Genetic System
Maintenance		2	dnaB	rne								2	dnaB	rne								2	dnaB	rne
RNA polymerase		5	rpoA	rpoZ	rpoC2	rpoC1	rpoB					5	rpoA	rpoZ	rpoC1	rpoC2	rpoB					5	rpoA	rpoZ	rpoC2	rpoC1	rpoB
Transcription factors		4	ntcA	ycf29	ompR	rbcR						4	ntcA	ycf29	ompR	rbcR						4	ntcA	ycf29	ompR	rbcR
Translation		4	tufA	infC	tsf	infB						4	tufA	infC	tsf	infB						4	tufA	infC	tsf	infB
Ribosomal proteins
Large subunit		28	rpl3	rpl4	rpl23	rpl2	rpl22	rpl16	rpl29	rpl14		28	rpl3	rpl4	rpl23	rpl2	rpl22	rpl16	rpl29	rpl14		28	rpl3	rpl4	rpl23	rpl2	rpl22	rpl16	rpl29	rpl14
			rpl24	rpl5	rpl6	rpl18	rpl36	rpl13	rpl19	rpl9			rpl24	rpl5	rpl6	rpl36	rpl13	rpl19	rpl9	rpl11			rpl24	rpl5	rpl6	rpl18	rpl36	rpl13	rpl19	rpl9
			rpl11	rpl1	rpl12	rpl27	rpl21	rpl32	rpl34	rpl28			rpl1	rpl12	rpl27	rpl21	rpl32	rpl34	rpl28	rpl33			rpl11	rpl1	rpl12	rpl27	rpl21	rpl32	rpl34	rpl28
			rpl33	rpl20	rpl35	rpl31							rpl35	rpl18	rpl20	rpl31							rpl33	rpl20	rpl35	rpl31
Small subunit		19	rps19	rps3	rps17	rps8	rps5	rps13	rps11	rps9		19	rps19	rps3	rps17	rps8	rps5	rps13	rps11	rps9		19	rps19	rps3	rps17	rps8	rps5	rps13	rps11	rps9
			rps12	rps7	rps10	rps1	rps16	rps6	rps4	rps2			rps12	rps7	rps10	rps1	rps16	rps6	rps4	rps2			rps12	rps7	rps10	rps1	rps16	rps6	rps4	rps2
			rps20	rps18	rps14								rps20	rps18	rps14								rps20	rps18	rps14
tRNA processing		1	tilS									1	tilS									1	tilS
Protein quality control		4	dnaK	ftsH	clpC	groEL						4	dnaK	ftsH	clpC	groEL						4	dnaK	ftsH	clpC	groEL
Photosystems
Phycobilisomes		12	apcD	cpcA	cpcB	cpeA	cpeB	nblA	cpcG	apcF		11	apcD	cpcA	cpcB	cpeA	cpeB	nblA	cpcG	cpcS		12	apcD	cpcA	cpcB	cpeA	cpeB	nblA	cpcG	apcF
			cpcS	apcB	apcA	apcE							apcB	apcA	apcE								cpcS	apcB	apcA	apcE
Photosystem I		13	psaE	psaJ	psaF	psaM	psaI	psaC	psaK	psaL		13	psaE	psaJ	psaF	psaM	psaI	psaC	psaK	psaL		13	psaE	psaJ	psaF	psaM	psaI	psaC	psaK	psaL
			ycf4	ycf3	psaD	psaA	psaB						ycf4	ycf3	psaD	psaA	psaB						ycf4	ycf3	psaD	psaA	psaB
Photosystem II		19	psbB	psbT	psbN	psbH	psbW	psbC	psbD	psbA		19	psbB	psbT	psbN	psbH	psbW	psbC	psbD	psbA		19	psbB	psbT	psbN	psbH	psbW	psbC	psbD	psbA
			psbY	psbY	psbX	psbE	psbF	psbL	psbJ	psb30			psbY	psbV	psbX	psbE	psbF	psbL	psbJ	psb30			psbY	psbY	psbX	psbE	psbF	psbL	psbJ	psb30
			psbI	psbK	psbZ								psbI	psbK	psbZ								psbI	psbK	psbZ
Cytochrome complex		11	petF	petD	petB	ccs1	petJ	ccsA	petA	petM		11	petF	petD	petB	ccs1	petJ	ccsA	petA	petM		12	petF	petD	petB	ccs1	petJ	ccsA	petA	petM
			petN	petG	petL								petN	petG	petL								petN	petG	petL	petP
Redox system		7	ftrB	trxA	pbsA	bas1	acsF	dsbD	grx			5	ftrB	trxA	bas1	acsF	dsbD					4	ftrB	trxA	bas1	acsF
ATP synthesis
ATP synthase		8	atpA	atpD	atpF	atpG	atpH	atpI	atpB	atpE		8	atpA	atpD	atpF	atpG	atpH	atpI	atpB	atpE		8	atpA	atpD	atpF	atpG	atpH	atpI	atpB	atpE
Metabolism
Carbohydrates		6	pgmA	cfxQ	rbcS	rbcL	pdhA	pdhB				6	pgmA	cfxQ	rbcS	rbcL	pdhA	pdhB				6	pgmA	cfxQ	rbcS	rbcL	pdhA	pdhB
Lipids		5	accD	fabH	accA	acpP	accB					5	accD	fabH	accA	acpP	accB					5	accD	fabH	accA	acpP	accB
Nucleotides		2	upp	carA								2	upp	carA								2	upp	carA
Amino acids		8	argB	ilvB	syfB	trpG	trpA	gltB	ilvH	hisS		8	argB	ilvB	syfB	trpG	trpA	gltB	ilvH	hisS		7	argB	ilvB	trpG	trpA	gltB	ilvH	hisS
Cofactors		8	moeB	thiS	thiG	chlN	chlL	chlI	preA	chlB		8	moeB	thiS	thiG	chlN	chlL	chlI	preA	chlB		8	moeB	thiS	thiG	chlN	chlL	chlI	preA	chlB
Secondary Metabolites		1	dfr									0										1	dfr
Transport
Transport		9	secY	ycf38	ycf63	secA	cemA	sufB	sufC	tatC		9	secY	ycf38	ycf63	secA	cemA	sufB	sufC	tatC		9	secY	ycf38	ycf63	secA	cemA	sufB	sufC	tatC
			secG										secG										secG
Unknown
Conserved ORFs		23	ycf33	ycf65	ycf19	ycf60	ycf35	ycf56	ycf54	ycf55		19	ycf33	ycf65	ycf19	ycf60	ycf56	ycf54	ycf55	ycf53		16	ycf65	ycf19	ycf60	ycf56	ycf54	ycf55	ycf53	ycf52
			ycf53	ycf52	ycf46	ycf21	ycf23	ycf22	ycf20	ycf80			ycf52	ycf21	ycf23	ycf22	ycf20	ycf91	ycf80	ycf41			ycf21	ycf23	ycf20	ycf91	ycf80	ycf41	ycf39	ycf45
			ycf34	ycf41	ycf39	ycf36	ycf45	ycf65	ycf37				ycf39	ycf92	ycf36	ycf45							ycf65
Unique ORFs		4	orf264	orf621	orf402	orf65	orf160					3	orf761	orf65	orf172							3	orf418	orf334	orf176
Pseudogene												1	dfr									1	ycf63
